# Supplementary material
Source: PubMed Central journal article supplement (PMC6610053)
Supplement: ajcr0009-1145-f7.pdf [file ajcr0009-1145-f7.pdf]

## Role of USP9X-PTGES-PGE2 axis in NSCLC

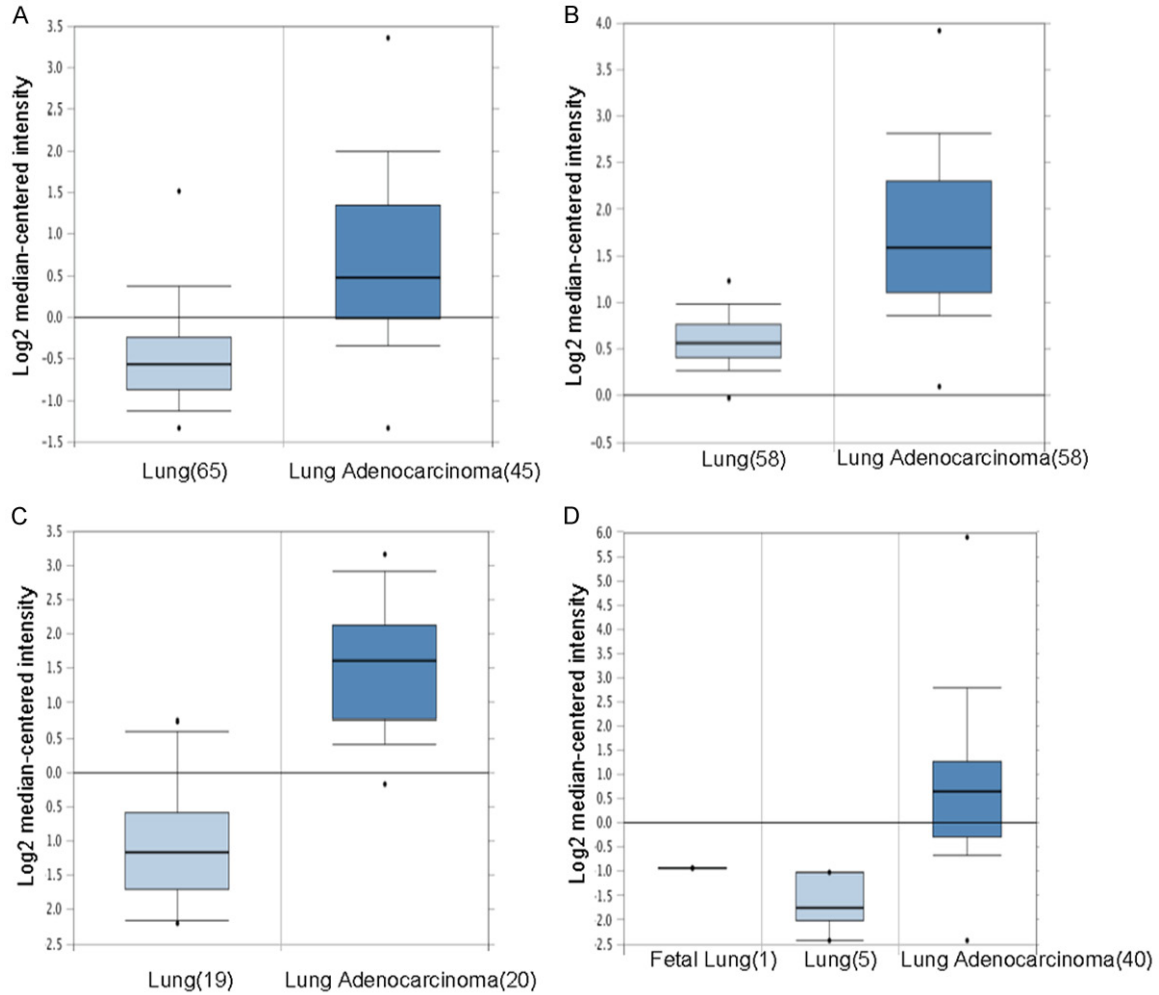

**Figure S1.** PTGES is dysregulated in human lung cancer. A-D. Relative mRNA expression levels of PTGES in human lung adenocarcinoma vs normal lung tissues based on data from ONCOMINE.
